## 1 **Efficient transgene-free genome editing in plants in the T0 generation based on a co-editing** 2 **strategy**

3 Xiaoen Huang<sup>1,2</sup>, Hongge Jia<sup>1,2</sup>, Jin Xu<sup>1</sup>, Yuanchun Wang<sup>1</sup>, Jiawen Wen<sup>1</sup>, Nian Wang<sup>1\*</sup>

4 <sup>1</sup> Citrus Research and Education Center, Department of Microbiology and Cell Science, Institute  
5 of Food and Agricultural Sciences, University of Florida, Lake Alfred, FL, United States.

6 <sup>2</sup> XH and HJ contributed equally.

7 \*Corresponding author email: [nianwang@ufl.edu](mailto:nianwang@ufl.edu)

### 8 **Abstract**

9 Transgene-free genome editing of plants in the T0 generation is highly desirable but challenging,  
10 especially in perennials and vegetatively propagated plants. Here, we investigated the co-editing  
11 strategy for generating transgene-free, gene-edited plants via *Agrobacterium*-mediated transient  
12 expression of cytosine base editor (CBE)/gRNA-Cas12a/crRNA-GFP *in planta*. Specifically,  
13 CBE/gRNA was used to base edit the *ALS* gene to confer resistance to herbicide chlorsulfuron as  
14 a selection marker, which has no negative effects on plant phenotypes; Cas12a/crRNA was used  
15 for editing genes(s) of interest; GFP was used for selecting transgene-free transformants. Using  
16 this approach, transgene-free genome-edited plants were efficiently generated for various genes  
17 (either individual or multiplex) in tomato, tobacco, potato, and citrus in the T0 generation. The  
18 biallelic/homozygous transgene-free mutation rates for target genes among herbicide-resistant  
19 transformants ranged from 8% to 50%. Whole genome sequencing further confirmed transgene-  
20 free and absence of off-target mutations in the edited plants. The co-editing strategy is efficient  
21 for generating transgene-free, genome-edited plants in the T0 generation, thus being a potent tool  
22 for plant genetic improvement.

### 23 **Main**

24 Transgene-free genome editing is highly desirable for plant genetic improvement. Cas9 and  
25 Cas12a DNA, mRNA or ribonucleoprotein complex (RNP) were successfully used to generate  
26 transgene-free plants<sup>1,2</sup>, which often require the transformation of embryogenic protoplasts.  
27 However, the regeneration of plants from protoplasts remains technically challenging and/or  
28 limited to specific plant species/genotypes<sup>3</sup>. Until now, most genome-edited plants were  
29 generated through *Agrobacterium*-mediated transformation and are transgenic. Genome editing  
30 via transgenic approaches not only causes regulatory and public concerns<sup>4</sup>, but also can generate  
31 new and off-target mutations in the next generation<sup>5-7</sup>. For annual crops such as rice, it is  
32 relatively easy to obtain transgene-free, gene-edited plants by genetic segregation via  
33 backcrossing or selfing<sup>8</sup>. However, for perennials and vegetatively propagated plants, it is  
34 laborious and time-consuming to remove transgenes. Many crops lose traits of the parental  
35 cultivars via backcrossing, owing to their heterozygous nature as hybrids. Furthermore, in some  
36 plants, such as citrus and apple, the transgene cannot be removed through seed segregation once

37 it is integrated into the plant genome because of their asexual reproduction nature through  
38 apomixis<sup>9, 10</sup>.

39 Even though genome editing via *Agrobacterium* results in transgenic plants, most T-DNAs used  
40 for carrying the Cas/gRNA do not integrate into the host chromosome, but are present in the  
41 nucleus, where they will be transcribed, leading to transient expression of the carried genes<sup>11, 12</sup>.  
42 The *Agrobacterium*-mediated transient expression was used for genome editing without  
43 transgene integration into plant genomes on several occasions<sup>13-16</sup>. The main drawback of this  
44 approach identified in previous studies is that the majority of transformants are wild type, and  
45 most edited plants are mosaic/chimera or heterozygous and additional generations are needed to  
46 identify transgene-free and homozygous/biallelic mutants. In addition, previous genome editing  
47 through transient expression of Cas/gRNA constructs is usually performed without selection  
48 pressure, making it difficult, laborious and time-consuming to differentiate edited plants from  
49 unedited ones<sup>17</sup>.

50 In this study, we aimed to generate transgene-free genome-edited plants by employing T-DNA  
51 carrying CBE/gRNA-Cas12a/crRNA-GFP to co-edit the *ALS* gene, which encodes acetolactate  
52 synthase, and gene(s) of interest. Herbicides, such as chlorsulfuron, kills plants by acting as the  
53 inhibitors of acetolactate synthase. Mutation in the *ALS* genes using CBE confers resistance to  
54 herbicides such as chlorsulfuron in diverse plant species<sup>10, 15, 18-25</sup>, thus providing a useful  
55 selection marker. The gene(s) of interest can be edited via Cas12a/crRNA, whereas GFP enables  
56 screening of putative transgene-free (GFP-negative) transformants. In this study, we have  
57 successfully used this co-editing strategy to efficiently generate transgene-free tomato, tobacco,  
58 potato, and citrus in the T0 generation for various genes. It is anticipated that this strategy will  
59 have broad applications in plant genetic improvements.

## 60 **Results**

### 61 **Transgene-free genome editing of tomato in the first generation (T0) by co-editing of the** 62 ***ALS* gene and gene of interest**

63 To test whether we can achieve transgene-free genome editing in the T0 generation by co-editing  
64 of the *ALS* gene and gene of interest, we employed the model plant tomato (*Solanum*  
65 *lycopersicum*) owing to its high efficacy in plant transformation and genome editing<sup>26</sup>,  
66 availability of high-quality genome sequences<sup>27</sup>. We first investigated if we could obtain  
67 transgene-free, gene-edited tomato in the T0 generation by base-editing *SIALS1*  
68 (Solyc03g044330) alone. Previous studies suggested such a possibility, but the putative  
69 transgene-free plants were not confirmed by whole genome sequencing<sup>10, 15, 28</sup>. Here, we  
70 constructed the CBE-Cas12a-GFP-SIALS1 construct to edit the *SIALS1* gene using CBE to target  
71 the proline residue at position 186 (Pro186) (Fig. 1a). Our CBE-Cas12a-GFP construct also  
72 contains a GFP expression cassette for screening putative transgene-free regenerants, and the  
73 highly efficient, temperature-tolerant *ttLbCas12a*<sup>29</sup> for editing gene of interest in downstream  
74 studies (Fig. 1a; Extended Data Figure S1). In accordance with the results reported by Veillet et  
75 al.<sup>15</sup>, base editing of *SIALS1* enabled the generation of herbicide-resistant tomato transformants

76 (Extended Data Figure S2). More than 20 chlorsulfuron-resistant lines without green  
77 fluorescence were obtained, suggesting putative transgene-free genome editing. Consistently, the  
78 *GFP* gene was not detected in 5 randomly selected GFP-negative lines with PCR (Fig. 1b). The  
79 targeted nucleotides of *SIALS1* gene by CBE were within the digestion site of the restriction  
80 enzyme *StyI* (Fig. 1a), which enables identification of edited sequences by digestion. Editing of  
81 the targeted nucleotides completely abolished digestion by *StyI* in one line, but partially  
82 abolished the digestion in four of the five tested lines (Fig. 1c), indicating homozygous/biallelic  
83 mutations in both alleles of *SIALS1* in line L2 and mutations in one allele only in the other four  
84 lines (L1, L3, L4, and L5). The mutations were confirmed by Sanger sequencing (Extended Data  
85 Figure S3). These results showed that editing Pro186 in either one or two *SIALS1* alleles enables  
86 herbicide resistance. To further confirm if the *SIALS1*-edited *GFP*-negative plants were indeed  
87 transgene-free, we conducted whole genome sequencing of the edited line 2 and confirmed the  
88 homozygous mutation of the *SIALS1* gene (Extended Data Figure S4). The sequence of the CBE-  
89 Cas12a-GFP-SIALS1 construct was not found in the genome of the *SIALS1*-edited, *GFP*-  
90 negative tomato plant. We also analyzed potential off-target genes. A total of 20 potential off-  
91 target sites with up to 4 mismatches to the target site were identified and none of them were  
92 edited (Extended Data Table S1), confirming the specificity of the base editing. These results  
93 show that we can obtain transgene-free, gene-edited plants in the first generation through base-  
94 editing of the *ALS* gene and selecting for chlorsulfuron-resistant and *GFP*-negative plants. This  
95 prompted us to further explore herbicide-assisted transgene-free genome editing in the T0  
96 generation for gene(s) of interest.

97 Co-editing of the *ALS* gene and gene(s) of interest has been suggested as a feasible approach to  
98 generate transgene-free plants<sup>10, 15</sup>. Next, we tested this hypothesis by co-editing *SIALS1* by CBE  
99 and *SIER* (Soly08g061560)<sup>30</sup> by Cas12a in tomato using our CBE-Cas12a-GFP construct (Fig.  
100 2a, Extended Data Figure S1). A total of 12 herbicide-resistant transformants without green  
101 fluorescence were selected for genotyping. Of the 12 herbicide-resistant transformants, the  
102 *SIALS1* gene was edited in all lines (Extended Data Figure S5). Five of these 12 herbicide-  
103 resistant plants were edited in *SIER*, with 3 being biallelic mutants and 2 being heterozygous  
104 mutants (Fig. 2b, Extended Data Figure S6). Consistent with the absence of green fluorescence,  
105 the 3 biallelic lines did not contain the *GFP* gene, as indicated by PCR, suggesting transgene-  
106 free (Fig. 2c). The 3 biallelic lines were further confirmed to be transgene-free by the absence of  
107 the *ttLbCas12a* sequence (Fig. 2c). The phenotypes of the *SIER* biallelic mutants included  
108 compact architecture, short petiole, densely clustered inflorescence, and enlarged SAM (Fig. 2d,  
109 e), in agreement with a previous report<sup>30</sup>. To test the heritability of the mutation, seeds of the  
110 *sler-4* T0 plant were germinated, and the resulting seedlings were genotyped. The genotyping  
111 analysis found that mutation in the *SIER* gene was indeed heritable, with the progeny being either  
112 homozygous (inheriting one of two edited alleles) or biallelic (the same as their parent)  
113 (Extended Data Figure S7a). Additionally, PCR analysis confirmed that the seedlings did not  
114 contain *ttLbCas12a* or *GFP* (Extended Data Figure S7b), which was consistent with the absence  
115 of green fluorescence in the *sler-4* seeds (Extended Data Figure S8).

116 The co-editing strategy was also successful in generating transgene-free mutant lines for *SIRBL2*  
117 (Solyc09g010880) and *SIRbohD* (Solyc03g117980). We obtained 5 biallelic/homozygous  
118 mutants among 12 genotyped plants for *SIRBL2* (Extended Data Figure S9a). GFP observation  
119 and PCR analysis of the *GFP* gene and *Cas12a* gene (Extended Data Figure S9b) demonstrated  
120 that these 5 lines were transgene-free. For co-editing of *SIRbohD* with *SIALS1*, we tested one or  
121 two crRNAs (Fig. 3a, b). When one crRNA was used to target *SIRbohD*, only 1 biallelic mutant  
122 was generated (line 1) (Fig. 3c) among 12 non-GFP transformants. When two crRNAs targeting  
123 two different sites of *SIRbohD* were used (1 of these 2 crRNAs was the same as aforementioned),  
124 25% biallelic/homozygous mutations were achieved (Fig. 3c, d, Extended Data Figure S10),  
125 suggesting that two crRNAs are more effective than one as reported previously<sup>31,32</sup>. GFP  
126 observation and PCR analysis of the *GFP* or *Cas12a* gene revealed that 3 lines, generated using  
127 either one or two crRNAs, were transgene-free (Fig. 3e).

### 128 **Transgene-free, multiplex genome editing of tomato in the T0 generation**

129 Next, we investigated whether we could achieve transgene-free, multiplex genome editing of  
130 tomato in the first generation. We performed co-editing of *SIEDS1* (Solyc06g071280) and  
131 *SIPAD4* (Solyc02g032850), with *SIALS1*. *EDS1* and *PAD4* are required for plant immunity<sup>33-35</sup>.  
132 Among 18 non-GFP regenerants, 6 lines contained biallelic/homozygous edits for both *SIEDS1*  
133 and *SIPAD4*, and 2 lines were biallelically edited in only *SIEDS1* but not *SIPAD4* (Fig. 4a,  
134 Supplementary Information File 1). The edited lines were transgene-free based on GFP  
135 observation and PCR analysis of the *GFP* and *Cas12a* genes (Fig. 4b). Similarly, we conducted  
136 multiplex gene editing of *SIDMR6* (Solyc03g080190)<sup>36</sup> and *SINVINH1* (Solyc12g099200) with  
137 *SIALS1*. We obtained 3 biallelic/homozygous *SIDMR6/SINVINH1* double mutants from 17 non-  
138 GFP transformants (Fig. 4c, Supplementary Information File 2). We also obtained 4  
139 homozygous/biallelic *slinvinh1* single mutants (Supplementary Information File 2). These edited  
140 lines were transgene-free based on GFP observation and PCR analysis of the *GFP* and *Cas12a*  
141 genes (Fig. 4d). Taken together, we can achieve transgene-free, multiplex gene editing of tomato  
142 in the T0 generation efficiently.

### 143 **Transgene-free genome editing of tobacco in the T0 generation**

144 Next, we tested whether the co-editing strategy could be used to generate transgene-free plants in  
145 other plant species. We first investigated the model plant tobacco (*Nicotiana tabacum*) by co-  
146 editing *NtPDS* with *NtALS* (Fig. 5a). It is noteworthy that *N. tabacum* contains two *PDS* genes,  
147 *NtPDS1* and *NtPDS2*. Thus, we designed one crRNA targeting a conserved region of both genes.  
148 Over 20 chlorsulfuron-resistant tobacco plants showing albino phenotype were obtained (Fig. 5a).  
149 Among them, 7 albino plants did not display obvious green fluorescence (Fig. 5a). We further  
150 confirmed the absence of *GFP* and *Cas12a* in three albino, non-fluorescent lines by PCR (Fig.  
151 5b, Extended Data Figure S11). As expected, the chlorsulfuron-resistant tobacco plant contained  
152 mutation in the *NtALS* gene, while the wild type *N. tabacum* did not contain the mutation in the  
153 *NtALS* gene (Fig. 5c, Extended Data Figure S12a). Genotyping of *NtPDS* in this line confirmed

154 editing of both *NtPDS1* and *NtPDS2* genes, which was responsible for the albino phenotype (Fig.  
155 5c, Extended Data Figure S12b).

### 156 **Transgene-free genome editing of potato in the T0 generation**

157 Furthermore, we investigated the feasibility of achieving transgene-free genome editing in potato,  
158 a vegetatively propagated crop with a tetraploid genome, using the co-editing strategy. We aimed  
159 to co-edit *StDMR6*, a disease susceptibility gene<sup>36,37</sup>, together with *StALS*, with a single crRNA  
160 that targets a conserved region in the first exon of four *StDMR6* alleles. A total of 15 GFP-  
161 negative shoots regenerated from chlorsulfuron-containing media were genotyped and 10 were  
162 found to be wild-type (WT) at *StDMR6*, while 5 carried heterozygous edits. However, no tetra-  
163 allelic *StDMR6* mutants were observed, even in transgenic lines. The genotyping of a  
164 representative edited line revealed that it was transgene-free with 2 of the 4 *StDMR6* alleles  
165 edited (Fig. 5d, e, Extended Data Figure S13). These results suggest that our strategy can  
166 generate transgene-free, gene-edited potato in the T0 generation, but the generation of tetra-  
167 allelic mutants needs further optimization.

### 168 **Transgene-free genome editing of citrus in the T0 generation**

169 Lastly, we aimed to achieve transgene-free genome editing of citrus in the T0 generation. Many  
170 tree plants, like citrus, have a long juvenile period, which makes it challenging to remove foreign  
171 DNA fragments when transgenic approaches are used for genome editing. We previously  
172 succeeded in obtaining transgene-free *ALS*-edited citrus through transient expression of CBE<sup>10</sup>.  
173 Here, we co-edited the TAL Effector Binding Element (EBE) region in the promoter of the citrus  
174 canker susceptibility gene *LOB1*<sup>38-41</sup> with citrus *ALS* using our PBE-Cas12a-GFP-LOBP  
175 construct (Extended Data Figure S14). We utilized nCas9-PBE, a variant of CBE that has a  
176 unique 5 nucleotide editing window, resulting in targeting the proline residue at position 188  
177 (Pro188) of *CsALS* only, which is equivalent to the proline residue at position 186 (Pro186) of  
178 *SIALS*<sup>42</sup>. In the presence of chlorsulfuron, 107 pummelo (*Citrus maxima*) shoots were generated.  
179 Among them, 4 shoots were GFP-positive (Fig. 6a), and 103 shoots were GFP-negative (Fig. 6a).  
180 Based on genotyping of the *CsALS* and EBE<sub>PthA4</sub>-LOBP, and PCR analysis of the *nptII* gene (Fig.  
181 6b), four transgene-free, EBE<sub>PthA4</sub>-LOBP-edited citrus lines were generated and subjected to  
182 downstream analyses. For the *CsALS* site, the four transgenic genome-edited and four transgene-  
183 free genome-edited lines contained homozygous/biallelic mutations (Extended Data Figures. S15  
184 and S16). Intriguingly, among the four transgenic citrus genome-edited lines, for the EBE<sub>PthA4</sub>-  
185 LOBP site, Pum<sub>GFP1</sub>, Pum<sub>GFP2</sub> and Pum<sub>GFP4</sub> were chimeric, but without wild type sequences,  
186 and Pum<sub>GFP3</sub> was wild type (Extended Data Fig. S15). Among the four transgene-free genome-  
187 edited lines, for the EBE<sub>PthA4</sub>-LOBP site, Pum<sub>NoGFP1</sub>, Pum<sub>NoGFP2</sub>, Pum<sub>NoGFP3</sub> and Pum<sub>NoGFP4</sub>  
188 contained biallelic, heterozygous, homozygous, and heterozygous mutations, respectively (Fig.  
189 6c, Extended Data Fig. S16). As expected, biallelic/homozygous mutants and chimeric mutants  
190 without wild type sequence in the EBE<sub>PthA4</sub>-LOBP site demonstrated canker resistance and did  
191 not show any canker symptoms after inoculation with *Xcc*, regardless of being transgenic or  
192 transgene-free (Fig. 6d). Wild type pummelo showed typical canker symptoms, such as

193 hyperplasia and hypertrophy (Fig. 6d). As a positive control, we inoculated wild type and  
194 genome-edited lines with Xcc $\Delta$ pthA4:dLOB1.5. dLOB1.5 is a designed TALE, which binds to a  
195 different region from the target EBE<sub>PthA4</sub>-LOBP site in the promoter region of *CsLOB1*, thus  
196 activating *LOB1* expression to cause canker symptoms<sup>41</sup>. Sanger sequencing results indicated  
197 that the dLOB1.5 binding sites were intact among the tested Pummelo plants (Extended Data Fig.  
198 S17). Consequently, Xcc $\Delta$ pthA4:dLOB1.5 caused typical canker symptoms in wild type and all  
199 EBE<sub>PthA4</sub>-LOBP-edited lines (Fig. 6d). Taken together, the mutation of EBE<sub>PthA4</sub>-LOBP  
200 conferred Pummelo canker resistance, consistent with previous studies<sup>39,41,43</sup>. Importantly, two  
201 transgene-free plants, Pum<sub>NoGFP</sub>1 and Pum<sub>NoGFP</sub>3, were resistant to *Xcc* infection (Fig. 6).

### 202 **Whole genome sequencing analysis of edited lines confirms transgene-free genome editing** 203 **without off-target mutations**

204 To further confirm whether the putative transgene-free genome-edited lines were indeed  
205 transgene-free, we conducted whole genome sequencing. For tomato, we sequenced six  
206 transgene-free lines that were edited for *SIRbohD* (#1, #2, #8), *SIER* (#4), *SIEDS1/SIPAD4* (#8,  
207 #18), as well as two transgenic control lines, EPGFP and *SIRbohD* (#6) (Extended Data Table  
208 S2). The sequencing coverage ranged from 28 × to 59 ×. Genomic analysis confirmed that the  
209 construct DNA was integrated into the genome of the transgenic control lines EPGFP and  
210 *SIRbohD* (#6) (Extended Data Table S2), as evidenced by the presence of construct reads  
211 (Extended Data Figure S18, Extended Data Table S2). In contrast, genomic analysis of the  
212 *SIRbohD* (#1, #2, #8), *SIER* (#4), *SIEDS1/SIPAD4* (#18) lines found no construct DNA  
213 (Extended Data Table S2). Intriguingly, *SIEDS1/SIPAD4* line 8 contained 281 reads matching  
214 construct sequences despite being GFP-negative and PCR-negative for GFP and Cas12a (Fig.  
215 4b). Genomic analysis of the edited lines confirmed genome editing, as demonstrated by Sanger  
216 sequencing results. For instance, *SIRbohD* edited line #1 contained biallelic mutations of -4/-8,  
217 whereas #8 contained homozygous mutations of 7 bp deletion at *SIRbohD* (Extended Data  
218 Figures. S19-S20), consistent with previous Sanger sequencing results (Fig. 3c, Extended Data  
219 Figure S10). We searched for potential off-target sites of the crRNA targeting *SIRbohD*, *SIER*,  
220 *SIEDS1*, *SIPAD4*, *SIINVINH1*, and *SIRBL2* genes using the CRISPR P v2.0 program and Cas-  
221 OFFinder program. Whole genome sequencing analyses or Sanger sequencing of PCR amplicons  
222 of the homologous sites showed no off-target mutations (Extended Data Table S3). Similarly,  
223 whole genome sequencing analysis of the GFP-negative, *LOB1*-edited citrus line Pum<sub>NoGFP</sub>3  
224 (Extended Data Table S2) found no construct DNA in its genome. Furthermore, whole genome  
225 sequencing analysis indicated that Pum<sub>NoGFP</sub>3 harbored heterozygous *CsALS* and homozygous  
226 mutant EBE<sub>PthA4</sub>-LOBP, which was consistent with Sanger sequencing results (Fig. 6c). In  
227 addition, off-targets were analyzed in Pum<sub>NoGFP</sub>3 based on whole genome sequencing data. In the  
228 case of mismatch number ≤ 5 for crRNA, there were eight potential off-targets (Extended Data  
229 Figure. S21). The off-target sites were visualized using IGV software version 2.15.4 (Robinson  
230 et al., 2011), and no off-target mutations were identified.

### 231 **Discussion**

232 In this study, we have developed a potent genome editing toolkit to generate transgene-free  
233 genome-edited plants in the T0 generation by co-editing the *ALS* gene and gene(s) of interest  
234 through *Agrobacterium*-mediated transient expression. It was successfully used for genome  
235 editing of tomato and tobacco (annuals), citrus (a perennial tree crop), and potato (a vegetatively  
236 propagated tetraploid crop). The biallelic/homozygous mutation rates for target genes among  
237 herbicide-resistant transformants in our study ranged from 8% to 50%, which is comparable to  
238 the genome editing efficacy using Cas/gRNA DNA, mRNA, or ribonucleoproteins<sup>1,2</sup>. The  
239 efficient identification of biallelic/homozygous mutants resulted from co-editing of the *ALS* gene,  
240 which provides a useful and practical selection marker as a gain-of-function against sulfonylurea  
241 herbicides. Importantly, precise editing by CBE targets the proline residue, for instance, Pro186  
242 in tomato or Pro188 in citrus, which probably disrupts the recognition and binding of the  
243 herbicides without affecting *ALS* function<sup>44</sup>. Consistently, *ALS* mutants at the proline residue  
244 did not show any phenotypical changes in our study. Natural mutations of the *ALS* gene are  
245 prevalent in plant species without affecting plant phenotypes (except herbicide resistance) and  
246 fitness<sup>45-49</sup>. Thus, editing of the *ALS* gene as a selection marker will not negatively affect genetic  
247 improvement of crops and their commercialization.

248 The co-editing strategy has multiple advantages in generating transgene-free genome-edited  
249 plants: 1) The co-editing strategy ensures transgene-free genome editing by transient expression  
250 of Cas/gRNA and removing of stable transformants using GFP as an indicator. Transiently  
251 expressed Cas/gRNA eventually degrades, thus mimicking the approaches that use Cas/gRNA  
252 DNA in transgene-free genome editing via transformation of protoplasts<sup>50</sup>. Genotyping of  
253 construct components such as GFP, Cas12a, or *nptII* genes and whole genome sequencing of  
254 putative transgene-free lines indeed confirm the absence of foreign genes in 87.5% (7 of 8)  
255 putative transgene-free lines. Intriguingly, the *sleds1/slpad4* line 8 contained 281 reads matching  
256 construct sequences whereas the two transgenic lines contained 1830 and 2716 construct reads.  
257 This is consistent with previous reports that small DNA fragments from transformed plasmids  
258 are sometimes inserted at both on-target and off-target sites in host cells, even though at low  
259 frequencies<sup>51</sup>. Consequently, whole genome sequencing is required to verify the edited lines to  
260 be transgene-free. “Transgene-free” is a prerequisite for commercialization of genetically  
261 modified organisms. Transgenic crops are under robust and strict regulations in different  
262 countries and regions,<sup>4</sup> and cause negative public reception, which impedes their  
263 commercialization despite superior traits. 2) Transgene-free lines without T-DNA eliminate the  
264 potential disruption of gene functions at the insertion site caused by T-DNA in *Agrobacterium*-  
265 mediated stable transformation<sup>52</sup>. Thus, this approach is not only suitable for crop genetic  
266 improvements, but also provides advantages in genetic studies. 3) Off-target mutations are  
267 another critical factor for consideration during genetic improvement by genome editing. No off-  
268 target mutations were identified in our genome-edited lines. This probably results from the short  
269 functional time of Cas/gRNA during transient expression, as suggested by previous studies<sup>10,53</sup>.  
270 Similarly, transient expression of Cas/gRNA DNA, mRNA, and RNP in embryogenic protoplasts,  
271 calli, or immature embryo cells has been reported to generate transgene-free plants without

272 causing off-target mutations<sup>1, 2, 54</sup>. 4) This co-editing strategy can produce transgene-free, gene-  
273 edited plants in the T0 generation. Generation of transgene-free genome-edited plants in the T0  
274 generation bypasses the need to remove transgenes in future generations by genetic separation  
275 via backcrossing or selfing. The removal of transgenes is not feasible for many crops which are  
276 asexually propagated, or highly heterozygous, or have long juvenility, such as grape, citrus,  
277 potato and banana. Generation of transgene-free plants in the T0 generation significantly  
278 expedites the genetic improvement of crops. For example, transgene-free citrus was generated  
279 within 6 months using our approach. However, it takes approximately 20 years to generate new  
280 citrus varieties using traditional breeding approach<sup>55</sup>. Lastly, our strategy is based on  
281 *Agrobacterium*-mediated delivery of CRISPR components into recipient plant tissues such as  
282 cotyledons, leaves, and epicotyls. Hence, it can be easily adopted because *Agrobacterium*-  
283 mediated transformation is one of the most widely used and convenient methods. Transformation  
284 of embryogenic protoplasts with Cas/gRNA RNP<sup>56</sup>, or DNA<sup>50</sup> has successfully generated  
285 transgene-free, genome-edited plants. However, plant regeneration from protoplasts is  
286 technically challenging. Noticeably, the regenerated plants from protoplasts are prone to  
287 somaclonal variations and genome instability<sup>57, 58</sup>. In addition, regeneration from protoplasts is  
288 not accessible to many plant species, especially monocots. Another method to generate  
289 transgene-free edits is to transiently deliver plasmids, mRNA, or RNPs directly into callus cells  
290 or immature embryos through biolistic particle bombardment<sup>3, 59, 60</sup>. However, due to low  
291 efficiency and no selection, a huge amount of work must be done on tissue culture, regeneration,  
292 genotyping, and selection of edited plants from unedited plants. It is not surprising that the co-  
293 editing strategy may also aid in the enrichment and selection of edited protoplasts, callus cells or  
294 immature embryos achieved through means other than *Agrobacterium*.

295 In sum, we have developed an efficient transgene-free genome editing methodology based on  
296 *Agrobacterium*-mediated transient expression for plants. As *Agrobacterium*-mediated  
297 transformation works for many plant species, we anticipate that this approach has broad  
298 applications in genetic improvements and genetic studies of plants. It is particularly useful for  
299 perennials and vegetatively propagated plants to generate transgene-free, gene-edited plants in  
300 the T0 generation.

## 301 **Methods**

### 302 **Making the CBE-Cas12a-GFP construct**

303 The CBE plasmid with GFP<sup>10</sup> was digested with *PmeI/RsrII* and the vector backbone was  
304 retained. The Cas12a-D156R<sup>29</sup> fragment was recovered by digesting Hybrid-D156R-PDS-  
305 LOB1-A containing *ttLbCas12a*<sup>29</sup> with *PmeI/RsrII*. These two fragments were then ligated to  
306 form CBE-Cas12a-partial. CBE-Cas12a-partial was then digested with *RsrII*. The other half of  
307 Cas12a was PCR-amplified using primers Cas12half-F1/Cas12half-R1 (Extended Data Table S4)  
308 with *ttLbCas12a*<sup>29</sup> as the template. The amplicon was then In-fusion cloned with the *RsrII*-  
309 digested CBE-Cas12a-partial to create CBE-Cas12a-GFP. The final construct was confirmed  
310 through Sanger sequencing.



### 311 **Making CBE-gRNA-Cas12a-crRNA-GFP constructs**

312 CBE-Cas12a-GFP was digested with *AarI* and ligated with annealed primers for *NtALS* or  
313 *CsNLS* or *SIALS1* or *StALS* (Extended Data Table S4) with compatible ends. A construct named  
314 PUC57-mini-crRNA was synthesized to drive crRNA expression (Extended Data Fig. S22). The  
315 crRNA array is flanked by ribozymes, Hammerhead (HH) and hepatitis delta virus (HDV), for  
316 precise processing<sup>61</sup>. Primers for single crRNA were annealed and ligated to *BsmBI*-digested  
317 PUC57-mini-crRNA. For multiplexing, multiple HH-DR-HDV units were PCR amplified from  
318 the synthesized plasmid PUC57-HDV-HH-DR (Extended Data Fig. S22). The PCR products  
319 were ligated and cloned into *BsmBI*-digested PUC57-mini-crRNA through GoldenGate cloning.  
320 The whole crRNA cassette, including the promoter and terminator, was PCR amplified using  
321 primers Mini-F1/Mini-R1 and cloned into the *SbfI*-digested CBE-Cas12a-GFP-ALS constructs  
322 using In-Fusion cloning (Takara Bio). All constructs were confirmed by sequencing.

### 323 **Making the GFP-p1380N-ttLbCas12a:LOBP1-PBE:ALS construct**

324 Using pUC-NosT-crRNA:LOBP as template<sup>43</sup>, the fragment containing AtU6-26 promoter, the  
325 coding sequence of hammerhead ribozyme (HH) and crRNA-LOBP1 was PCR-amplified using  
326 primers AtU6-5-*XhoI* (5'-AGGTCTCGAGTCGTTGAACAACGGAACTCGA CTTGCC-3')  
327 and CrRNA-LBDP1-phos (5'-phosphorylated- AAGGCAAAGGGGTTTATAT  
328 AGAATCTACACTTAGTAGAAATTAga -3'), and the fragment containing the coding  
329 sequence of hepatitis delta virus ribozyme (HDV) and NosT was PCR-amplified using primers  
330 HDV-5-Phos (5'-phosphorylated- GGCCGGCATGGTCCCAGCCTCCTCGCT - 3') and NosT-  
331 3-*AscI* (5'-ACCTGGGCCCGGCGCGCCGATCTAGTAACATAGATGA-3'). *XhoI*-cut AtU6-  
332 26-HH-crRNA-LOBP1 and *AscI*-cut HDV-NosT were inserted into *XhoI-AscI*-cut pUC-NosT-  
333 MCS to build pUC-NosT-crRNA:LOBP1 through three-way ligation, in which the vector and  
334 two DNA fragments were ligated together in one step. pUC-NosT-MCS contained *EcoRI*-NosT-  
335 *XhoI-AscI-XbaI-PmeI* for cloning, as described before<sup>62</sup>. Subsequently, the *EcoRI*-NosT-  
336 crRNA:LOBP1-NosT-*AscI-XbaI-PmeI* fragment was cloned into *EcoRI-PmeI*-cut GFP-p1380N-  
337 ttLbCas12a to generate GFP-p1380N- ttLbCas12a:LOBP1-*AscI-XbaI-PmeI* (Extended Data  
338 Figure S14). GFP-p1380N-ttLbCas12a was constructed previously<sup>63</sup>.

339 From vector CmYLCV-A3A-RAD51-nCas9<sup>10</sup>, the CmYLCV promoter was amplified using  
340 primer CmYLCV-5-*HindIII-SbfI-AscI* (5'-AGGTAAGCTTCCTGCAGGCGCG  
341 CCAGATTTGCCTTTTCAATTTTCAGAAAGA-3') and CmYLCV-3-*BamHI* (5'-AGGTGGAT  
342 CCAGCTTAGCTCTTACCTGTTTTTCGTCTGT-3'). *HindIII-BamHI*-cut CmYLCV was cloned  
343 into *HindIII-BamHI*-cut pnCas9-PBE vector from Addgene (Addgene plasmid #98164) to build  
344 pCmYLCV-nCas9-PBE. To produce GFP-p1380N-CmYLCV-nCas9-PBE, the *SbfI-EcoRI*-cut  
345 CmYLCV-nCas9-PBE fragment was ligated with the *SbfI-EcoRI*-cut GFP-p1380N-Cas9  
346 construct<sup>40</sup>

347 From 35S-SpCas9p:DunLOBP<sup>43</sup>, the AtU6-26 promoter was amplified again using AtU6-26-5-  
348 *XhoI* and AtU6-26-3-phos (5'-phosphorylated-AATCACTACTTCGACTCTAGCTGT-3'), and  
349 the sgRNA-ALSBE-NosT was PCR-amplified using sgRNA-ALSBE-P (5'-phosphorylated-

350 GcaggtcccgcggaggatgatGTTTTAGAGCTAGAAATAGCAAGT-3') and NosT-3-*SpeI*. Through  
351 three-way ligation, *XhoI*-cut AtU6-26 and *SpeI*-digested sgRNA-ALSBE-NosT were inserted  
352 into *XhoI-XbaI*-treated pUC-NosT-MCS to construct pUC-NosT-AtU6-26-sgRNA-ALSBE.  
353 Finally, the *EcoRI*-NosT-AtU6-26-sgRNA-ALSBE-NosT-*PmeI* fragment from pUC-NosT-  
354 AtU6-26-sgRNA-ALSBE were cloned into *EcoRI-PmeI*-cut GFP-p1380N-CmYLCV-nCas9-  
355 PBE to build GFP-p1380N-PBE:ALS (Extended Data Figure S14). The *AscI-PmeI*-cut  
356 CmYLCV-nCas9-PBE:ALS fragment from GFP-p1380N-PBE:ALS was clone into *AscI-PmeI*-  
357 cut vector GFP-p1380N-ttLbCas12a:LOBP1-*AscI-XbaI-PmeI* to form GFP-p1380N-  
358 ttLbCas12a:LOBP1-PBE:ALS (Extended Data Figure S14). All constructs were confirmed by  
359 sequencing.

### 360 **Plant transformation**

361 The final constructs were transformed into either the *Agrobacterium* strain AGL1 (for tomato  
362 and potato) or EHA105 (for tobacco and citrus). For tomato transformation (cultivar  
363 MoneyMaker), we followed the described protocol<sup>64</sup> with modifications. After co-cultivating the  
364 cotyledon explants on co-cultivation medium for three days, the explants were subcultured on a  
365 Murashige and Skoog (MS) regeneration medium with 2 mg/L zeatin riboside and 350 mg/L  
366 Timentin (for *Agrobacterium* elimination) at 30°C for 6 to 10 days. The explants were then  
367 subcultured on the same regeneration medium with 2 mg/L zeatin riboside, 350 mg/L Timentin,  
368 and 110 nM herbicide chlorsulfuron to select chlorsulfuron-resistant calli and shoots. The calli  
369 showing green fluorescence were discarded, while the non-fluorescent calli were kept as  
370 potential transgene-free, gene-edited transformants for further culture on chlorsulfuron-  
371 containing regeneration media. A similar protocol was used for tobacco transformation, using  
372 young sterile tobacco leaf discs as explants, and a regeneration medium containing 1 mg/L 6-  
373 Benzylaminopurine (BAP), 0.1 mg/L Naphthalene acetic acid (NAA), 350 mg/L Timentin, and  
374 250 nM herbicide chlorsulfuron. For potato transformation, the tetraploid cultivar Atlanta  
375 plantlets were purchased from the University of Wisconsin and the University of Idaho. A  
376 similar protocol was used for potato transformation. Potato leaves were used as explants for  
377 transformation. The regeneration medium for potato transformation contains 1 mg/L Zeatin, 2  
378 mg/L Gibberellic acid (GA), 350 mg/L Timentin, 100 nM herbicide chlorsulfuron. For citrus  
379 transformation, we followed the protocol we developed previously<sup>10</sup>. Plants were grown at room  
380 temperature (22 °C - 25 °C) with a 16-hour light/8-hour dark cycle. After rooting, the plants  
381 were transferred to a glasshouse.

### 382 **Canker symptom assay in citrus**

383 Wild type, transgenic and transgene-free Pummelo plants were grown in a greenhouse at the  
384 Citrus Research and Education Center, University of Florida. Prior to *Xcc* treatment, all plants  
385 were trimmed to generate new shoots. Leaves of similar age were infiltrated with either *Xcc* or  
386 *Xcc*ΔpthA4:dLOB1.5 ( $5 \times 10^8$  CFU/mL) using needleless syringes. At five days post inoculation  
387 (DPI), canker symptoms were observed and photographed.

### 388 **Microscopy analysis**

389 An Omax camera was installed to a Zeiss Stemi SV11 dissecting microscope for photographing  
390 GFP fluorescence. Under illumination of the Stereo Microscope Fluorescence Adapter  
391 (NIGHTSEA), GFP fluorescence was visualized. Subsequently, the samples were photographed  
392 with the Omax Touptview software connected to the Omax camera.

### 393 **Genomic DNA extraction and genotyping**

394 Genomic DNA was extracted from plant leaves with a cetyltrimethylammonium bromide  
395 (CTAB)-based genomic DNA extraction protocol we described previously<sup>39, 65</sup>. Detection of  
396 edits in the target genes was performed via PCR amplification of fragments spanning gRNAs or  
397 crRNAs, followed by cloning of PCR products into a cloning vector (Zero Blunt™ TOPO™  
398 PCR Cloning Kit, Invitrogen) and Sanger sequencing. At least 10 clones for each gene from each  
399 plant were subjected to Sanger sequencing. Primers were designed for the detection of *GFP*  
400 fragment near the T-DNA right border, and *Cas12a* fragment near the T-DNA left border in the  
401 edited plant lines.

### 402 **Whole genome sequencing and data analysis**

403 The 150-bp paired-end reads whole genome sequencing data were generated using the Illumina  
404 NovaSeq 6000 platform by Novogene. The raw reads were filtered using Fastp version 0.22.0 to  
405 remove low-quality reads. On average, more than 20.6 and 48.4Gb of high-quality data were  
406 generated for each citrus Pummelo and tomato plant sample, respectively. The high-quality  
407 paired-end short genomic reads were mapped to the reference genomes of citrus Pummelo (*C.*  
408 *maxima*) or tomato using Bowtie2 software version 2.2.6<sup>66</sup>. The mutations (single nucleotide  
409 polymorphisms, deletions, and insertions) in the gene-edited plant genomes were generated using  
410 the SAMtools package version 1.2<sup>67</sup> and Deepvariant program version 1.4.0<sup>68</sup>. The mutations  
411 were filtered based on quality and sequence depth, and the target site mutations were visualized  
412 using IGV software version 2.15.4<sup>69</sup>. The off-target sites were predicted using CRISPR-P 2.0<sup>70</sup>  
413 and the Cas-OFFinder program<sup>71</sup> and aligning target sequence with whole genome using blast  
414 program. Based on the mapping results, mutations of off-target sites were detected using the  
415 SAMtools package version 1.2 and deepvariant program version 1.4.0.

### 416 **Figure legends**

417 **Fig. 1. Establishment of herbicide-assisted transgene-free genome editing system. a,** The  
418 CBE-Cas12a-GFP-SIALS1 construct used in the generation of transgene-free, *SIALS1*-edited  
419 tomato. The gRNA for *SIALS1* is boxed. The targeted nucleotides (CC) are highlighted in yellow.  
420 CsVMV, *Cassava vein mosaic virus* promoter; U6, citrus U6 promoter; CmYLCV, *Cestrum*  
421 *yellow leaf curling virus* promoter; CBE, cytosine base editor; T, terminator. For GFP, Nos  
422 terminator; for SIALS gRNA, poly (T) terminator; for CBE and Cas12a, HSP 18.2 terminator.  
423 RB, T-DNA right border; LB, T-DNA left border. **b,** PCR amplification of *GFP* in the  
424 regenerated chlorsulfuron-resistant tomato lines with or without green fluorescence. **c,** *SIALS1*  
425 gene genotyping of chlorsulfuron-resistant tomato regenerants through restriction enzyme  
426 digestion of PCR amplicons with *StyI*. PCR amplicons spanning the *SIALS1* gRNA region were

427 subjected to restriction enzyme digestion with *StyI*. Editing of the targeted nucleotides abolishes  
428 the *StyI* recognition site, resulting in resistance to *StyI* digestion. Bottom text: *SIALS1* genotypes  
429 in the edited lines were confirmed by Sanger sequencing.

430 **Fig. 2. Transgene-free gene editing in the first generation (T0) in tomato.** **a**, CBE-Cas12a-  
431 GFP-SIALS1-SIER construct used in the generation of transgene-free, *SIALS1*-edited, *SIER*-  
432 edited tomato. CsVMV, *Cassava vein mosaic virus* promoter; U6, U6 promoter; CmYLCV,  
433 *Cestrum yellow leaf curling virus* promoter; HH, ribozyme Hammerhead; DR, direct repeat;  
434 HDV, ribozyme hepatitis delta virus, CBE, cytosine base editor; T, terminator. For GFP, Nos  
435 terminator; for *SIALS* gRNA, poly (T) terminator; for *SIER* crRNA, poly (T) terminator followed  
436 by HSP 18.2 terminator; for CBE and Cas12a, HSP 18.2 terminator. RB, T-DNA right border;  
437 LB, T-DNA left border. **b**, The *SIER* genotypes of the edited lines without green fluorescence. **c**,  
438 PCR amplification of *GFP* and *Cas12a* from the biallelic mutants in **b**. **d, e**, Phenotypes of a  
439 representative transgene-free, *SIER*-edited line *sler-4*.

440 **Fig. 3. Efficient transgene-free gene editing of tomato in the T0 generation with 2 crRNAs.**  
441 **a**, Construct scheme showing 1 crRNA targeting *SIRbohD*. Other parts of the construct are not  
442 shown. **b**, Construct scheme showing 2 crRNAs targeting *SIRbohD*. **c**, The *SIRbohD* genotypes  
443 of the transgene-free, homozygous/biallelic edited lines without green fluorescence. **d**,  
444 Comparison of rate of transgene-free, homozygous/biallelic mutants using 1 crRNA and 2  
445 crRNAs. **e**, PCR amplification of *GFP* and *Cas12a* in the lines shown in **c**.

446 **Fig. 4. Transgene-free, multiplex gene editing of tomato in the first generation.** **a**,  
447 Generation of transgene-free, biallelic/homozygous double mutants of tomato for *SIEDS1* and  
448 *SIPAD4*. **b**, PCR amplification of *GFP* and *Cas12a* from the edited *sleds1/slpad4* mutant lines  
449 from **a**. **c**, Generation of transgene-free, biallelic/homozygous double mutants for *SIDMR6* and  
450 *SIINVINH1*. **d**, PCR amplification of *GFP* and *Cas12a* from the edited *sldmr6/slinvinh1* mutant  
451 lines from **c**.

452 **Fig.5: Transgene-free gene editing in the first generation (T0) in tobacco and potato.** **a-c**,  
453 Co-editing of *NtALS* and *NtPDS* in *Nicotiana tabacum*. **a**, Albino phenotype with or without  
454 green fluorescence. Regenerants were selected on herbicide chlorsulfuron-containing media.  
455 Upper: transgenic albino tobacco plant; lower: transgene-free albino tobacco plant. **b**,  
456 Confirmation of transgene-free gene editing. PCR amplification of *GFP* and *Cas12a* in WT,  
457 non-transgenic (NT), and transgenic (T) plants. **c**, Genotypes of *NtALS*, *NtPDS* genes in a  
458 transgene-free, albino tobacco line from **a**. **d & e**, Transgene-free gene editing in potato. **d**, PCR  
459 amplification of *GFP* and *Cas12a* from a regenerated potato line 9 and control transgenic plant. **e**,  
460 Genotype of line 9 at *StDMR6*. crRNAs are underlined. 1 crRNA was used for *StDMR6* editing.

461 **Fig. 6: Transgene-free gene editing in the first generation (T0) in pummelo (*Citrus maxima*).**  
462 **a**, GFP fluorescence was observed in transgenic Pummelo plants, whereas wild type and  
463 transgene-free plants did not exhibit any GFP signal. **b**, Using a pair of primers Npt-Seq-5 and  
464 35T-3PCR, wild type, transgenic and transgene-free Pummelo plants were analyzed. The wild  
465 type Pummelo and plasmid GFP-p1380N-ttLbCas12a:LOBP1-EBE:ALS were used as controls.

466 M, 1kb DNA ladder. **c**, Sanger sequencing analysis of GFP-negative lines by PCR amplification  
467 and cloning of *LOB1* promoter. **d**, Canker-resistance in the transgenic and transgene-free  
468 Pummelo plants. Five days post *Xanthomonas citri* subsp. *citri* (Xcc) inoculation, citrus canker  
469 symptoms were observed on wild type Pummelo, transgenic Pum<sub>GFP3</sub>, transgene-free Pum<sub>NoGFP1</sub>  
470 and Pum<sub>NoGFP3</sub>, whereas no canker symptoms were observed on other LOBP-edited Pummelo  
471 plants, which could be attributed to 100% mutation rates in Pum<sub>GFP1</sub>, Pum<sub>GFP2</sub>, Pum<sub>GFP4</sub>,  
472 Pum<sub>NoGFP2</sub> and Pum<sub>NoGFP4</sub>. As expected, *XccpthA4:Tn5(dCsLOB1.5)* caused canker symptoms  
473 on all plants. dCsLOB1.5 induces *LOB1* to cause canker symptoms by recognizing a different  
474 region from EBE<sub>PthA4</sub>-TII LOBP. GFP-positive lines: Pum<sub>GFP1</sub> to Pum<sub>GFP4</sub>. GFP-negative lines:  
475 Pum<sub>NoGFP1</sub> to Pum<sub>NoGFP4</sub>.

#### 476 **Data availability**

477 The raw reads of genome resequencing for pumelo plants were deposited in the NCBI Bioproject  
478 database under the accession number PRJNA931434. The reference genome of pumelo was  
479 downloaded from public citrus genome database CPBD: Citrus Pan-genome to Breeding  
480 Database (<http://citrus.hzau.edu.cn/index.php>). The raw reads of genome resequencing for  
481 tomato plants were deposited in the NCBI Bioproject database under the accession number  
482 PRJNA931572. The reference genome of tomato was downloaded from public tomato genome  
483 database of International Tomato Genome Sequencing Project  
484 [https://solgenomics.net/organism/Solanum\\_lycopersicum/genome](https://solgenomics.net/organism/Solanum_lycopersicum/genome).

485

#### 486 **References**

- 487 1. Zhang, Y. et al. Efficient and transgene-free genome editing in wheat through transient  
488 expression of CRISPR/Cas9 DNA or RNA. *Nat Commun* **7**, 12617 (2016).
- 489 2. Woo, J.W. et al. DNA-free genome editing in plants with preassembled CRISPR-Cas9  
490 ribonucleoproteins. *Nat Biotechnol* **33**, 1162-1164 (2015).
- 491 3. Svitashchev, S., Schwartz, C., Lenderts, B., Young, J.K. & Cigan, A.M. Genome editing in maize  
492 directed by CRISPR-Cas9 ribonucleoprotein complexes. *Nature Communications* **7** (2016).
- 493 4. Turnbull, C., Lillemo, M. & Hvoslef-Eide, T.A.K. Global Regulation of Genetically Modified  
494 Crops Amid the Gene Edited Crop Boom - A Review. *Frontiers in Plant Science* **12** (2021).
- 495 5. Zhang, H. et al. The CRISPR/Cas9 system produces specific and homozygous targeted gene  
496 editing in rice in one generation. *Plant Biotechnology Journal* **12**, 797-807 (2014).
- 497 6. Zhang, Q. et al. Potential high-frequency off-target mutagenesis induced by CRISPR/Cas9 in  
498 *Arabidopsis* and its prevention. *Plant Molecular Biology* **96**, 445-456 (2018).
- 499 7. Qin, R.Y. et al. SpCas9-NG self-targets the sgRNA sequence in plant genome editing. *Nature*  
500 *Plants* **6**, 197+ (2020).
- 501 8. He, Y.B. & Zhao, Y.D. Technological breakthroughs in generating transgene-free and genetically  
502 stable CRISPR-edited plants. *Abiotech* **1**, 88-96 (2020).
- 503 9. Wang, X. et al. Genomic analyses of primitive, wild and cultivated citrus provide insights into  
504 asexual reproduction. *Nature Genetics* **49**, 765+ (2017).
- 505 10. Huang, X., Wang, Y. & Wang, N. Base Editors for Citrus Gene Editing. *Frontiers in Genome*  
506 *Editing* **4** (2022).

- 507 11. Tyurin, A.A., Suhorukova, A.V., Kabardaeva, K.V. & Goldenkova-Pavlova, I.V. Transient Gene  
508 Expression is an Effective Experimental Tool for the Research into the Fine Mechanisms of Plant  
509 Gene Function: Advantages, Limitations, and Solutions. *Plants (Basel)* **9** (2020).
- 510 12. Kapila, J., De Rycke, R., Van Montagu, M. & Angenon, G. An Agrobacterium-mediated transient  
511 gene expression system for intact leaves. *Plant Science* **122**, 101-108 (1997).
- 512 13. Chen, L.Z. et al. A method for the production and expedient screening of CRISPR/Cas9-mediated  
513 non-transgenic mutant plants. *Horticulture Research* **5** (2018).
- 514 14. Danilo, B. et al. Efficient and transgene-free gene targeting using Agrobacterium-mediated  
515 delivery of the CRISPR/Cas9 system in tomato. *Plant Cell Reports* **38**, 459-462 (2019).
- 516 15. Veillet, F. et al. Transgene-Free Genome Editing in Tomato and Potato Plants Using  
517 Agrobacterium-Mediated Delivery of a CRISPR/Cas9 Cytidine Base Editor. *International*  
518 *Journal of Molecular Sciences* **20** (2019).
- 519 16. Banfalvi, Z., Csakvari, E., Villanyi, V. & Kondrak, M. Generation of transgene-free PDS mutants  
520 in potato by Agrobacterium-mediated transformation. *Bmc Biotechnology* **20** (2020).
- 521 17. He, Y., Mudgett, M. & Zhao, Y. Advances in gene editing without residual transgenes in plants.  
522 *Plant Physiology* **188**, 1757-1768 (2022).
- 523 18. Kuang, Y.J. et al. Base-Editing-Mediated Artificial Evolution of OsALS1 In Planta to Develop  
524 Novel Herbicide-Tolerant Rice Germplasms. *Molecular Plant* **13**, 565-572 (2020).
- 525 19. Malabarba, J. et al. New Strategies to Overcome Present CRISPR/Cas9 Limitations in Apple and  
526 Pear: Efficient Dechimerization and Base Editing. *International Journal of Molecular Sciences*  
527 **22** (2021).
- 528 20. Wu, J. et al. Engineering herbicide-resistant oilseed rape by CRISPR/Cas9-mediated cytosine  
529 base-editing. *Plant Biotechnology Journal* **18**, 1857-1859 (2020).
- 530 21. Zhang, R. et al. Generating broad-spectrum tolerance to ALS-inhibiting herbicides in rice by base  
531 editing. *Science China-Life Sciences*.
- 532 22. Liang, Z., Wu, Y.Q., Ma, L.L., Guo, Y.J. & Ran, Y.D. Efficient Genome Editing in *Setaria italica*  
533 Using CRISPR/Cas9 and Base Editors. *Frontiers in Plant Science* **12** (2022).
- 534 23. Zhang, R. et al. Generation of herbicide tolerance traits and a new selectable marker in wheat  
535 using base editing. *Nature Plants* **5**, 480-485 (2019).
- 536 24. Bottero, E. et al. Generation of a multi-herbicide-tolerant alfalfa by using base editing. *Plant Cell*  
537 *Reports* **41**, 493-495 (2022).
- 538 25. Cheng, H.T. et al. Base editing with high efficiency in allotetraploid oilseed rape by A3A-PBE  
539 system. *Plant Biotechnology Journal* **19**, 87-97 (2021).
- 540 26. Brooks, C., Nekrasov, V., Lippman, Z.B. & Van Eck, J. Efficient Gene Editing in Tomato in the  
541 First Generation Using the Clustered Regularly Interspaced Short Palindromic Repeats/CRISPR-  
542 Associated9 System. *Plant Physiology* **166**, 1292-1297 (2014).
- 543 27. Sato, S. et al. The tomato genome sequence provides insights into fleshy fruit evolution. *Nature*  
544 **485**, 635-641 (2012).
- 545 28. Alquezar, B., Bennici, S., Carmona, L., Gentile, A. & Pena, L. Generation of Transfer-DNA-Free  
546 Base-Edited Citrus Plants. *Frontiers in Plant Science* **13** (2022).
- 547 29. Schindele, P. & Puchta, H. Engineering CRISPR/LbCas12a for highly efficient, temperature-  
548 tolerant plant gene editing. *Plant Biotechnology Journal* **18**, 1118-1120 (2020).
- 549 30. Kwon, C.T. et al. Rapid customization of Solanaceae fruit crops for urban agriculture. *Nature*  
550 *Biotechnology* **38**, 182-+ (2020).
- 551 31. Cermak, T. et al. A Multipurpose Toolkit to Enable Advanced Genome Engineering in Plants.  
552 *Plant Cell* **29**, 1196-1217 (2017).
- 553 32. Xie, K.B., Minkenberg, B. & Yang, Y.N. Boosting CRISPR/Cas9 multiplex editing capability  
554 with the endogenous tRNA-processing system. *Proceedings of the National Academy of Sciences*  
555 *of the United States of America* **112**, 3570-3575 (2015).

- 556 33. Rusterucci, C., Aviv, D.H., Holt, B.F., Dangl, J.L. & Parker, J.E. The disease resistance signaling  
557 components EDS1 and PAD4 are essential regulators of the cell death pathway controlled by  
558 LSD1 in arabidopsis. *Plant Cell* **13**, 2211-2224 (2001).
- 559 34. Cui, H.T. et al. A core function of EDS1 with PAD4 is to protect the salicylic acid defense sector  
560 in Arabidopsis immunity. *New Phytologist* **213**, 1802-1817 (2017).
- 561 35. Pruitt, R.N. et al. The EDS1-PAD4-ADR1 node mediates Arabidopsis pattern-triggered immunity.  
562 *Nature* **598**, 495-+ (2021).
- 563 36. Thomazella, D.P.D. et al. Loss of function of a DMR6 ortholog in tomato confers broad-spectrum  
564 disease resistance. *Proceedings of the National Academy of Sciences of the United States of*  
565 *America* **118** (2021).
- 566 37. Sun, K.L. et al. Silencing susceptibility genes in potato hinders primary infection with  
567 *Phytophthora infestans* at different stages. *Horticulture Research* **9** (2022).
- 568 38. Hu, Y. et al. Lateral organ boundaries 1 is a disease susceptibility gene for citrus bacterial canker  
569 disease. *Proceedings of the National Academy of Sciences of the United States of America* **111**,  
570 E521-E529 (2014).
- 571 39. Huang, X., Wang, Y. & Wang, N. Highly Efficient Generation of Canker-Resistant Sweet Orange  
572 Enabled by an Improved CRISPR/Cas9 System. *Front. Plant Sci.* **12:769907** (2022).
- 573 40. Jia, H.G. et al. Genome editing of the disease susceptibility gene CsLOB1 in citrus confers  
574 resistance to citrus canker. *Plant Biotechnology Journal* **15**, 817-823 (2017).
- 575 41. Jia, H. & Wang, N. (Plant Biotechnology Journal; 2020).
- 576 42. Zong, Y. et al. Efficient C-to-T base editing in plants using a fusion of nCas9 and human  
577 APOBEC3A. *Nature Biotechnology* **36**, 950-+ (2018).
- 578 43. Hongge, J., Ahmad, O., Vladimir, O. & Nian, W. Biallelic Editing of the LOB1 Promoter via  
579 CRISPR/Cas9 Creates Canker-Resistant 'Duncan' Grapefruit. *Phytopathology* **112**, 308-314  
580 (2022).
- 581 44. Shimizu, M. et al. Selectable tolerance to herbicides by mutated acetolactate synthase genes  
582 integrated into the chloroplast genome of tobacco. *Plant Physiology* **147**, 1976-1983 (2008).
- 583 45. Li, J. et al. A novel naturally Phe206Tyr mutation confers tolerance to ALS-inhibiting herbicides  
584 in *Alopecurus myosuroides*. *Pesticide Biochemistry and Physiology* **186** (2022).
- 585 46. Powles, S.B. & Yu, Q. Evolution in Action: Plants Resistant to Herbicides. *Annual Review of*  
586 *Plant Biology, Vol 61* **61**, 317-347 (2010).
- 587 47. Tranel, P.J. & Wright, T.R. Resistance of weeds to ALS-inhibiting herbicides: what have we  
588 learned? *Weed Science* **50**, 700-712 (2002).
- 589 48. Kreiner, J.M. et al. Repeated origins, widespread gene flow, and allelic interactions of target-site  
590 herbicide resistance mutations. *Elife* **11** (2022).
- 591 49. Babineau, M., Mathiassen, S.K., Kristensen, M. & Kudsk, P. Fitness of ALS-Inhibitors Herbicide  
592 Resistant Population of Loose Silky Bentgrass (*Apera spica-venti*). *Frontiers in Plant Science* **8**  
593 (2017).
- 594 50. Wu, S. et al. Establishment of a PEG-mediated protoplast transformation system based on DNA  
595 and CRISPR/Cas9 ribonucleoprotein complexes for banana. *BMC Plant Biology* **20**, 425 (2020).
- 596 51. Kim, S., Kim, D., Cho, S.W., Kim, J. & Kim, J.S. Highly efficient RNA-guided genome editing  
597 in human cells via delivery of purified Cas9 ribonucleoproteins. *Genome Research* **24**, 1012-1019  
598 (2014).
- 599 52. O'Malley, R.C. & Ecker, J.R. Linking genotype to phenotype using the Arabidopsis unimutant  
600 collection. *Plant Journal* **61**, 928-940 (2010).
- 601 53. Randall, L.B. et al. Genome- and transcriptome-wide off-target analyses of an improved cytosine  
602 base editor. *Plant Physiology* **187**, 73-87 (2021).
- 603 54. Liang, Z. et al. Efficient DNA-free genome editing of bread wheat using CRISPR/Cas9  
604 ribonucleoprotein complexes. *Nat Commun* **8**, 14261 (2017).
- 605 55. Omura, M. & Shimada, T. Citrus breeding, genetics and genomics in Japan. *Breeding Science* **66**,  
606 3-17 (2016).

- 607 56. Woo, J.W. et al. DNA-free genome editing in plants with preassembled CRISPR-Cas9  
608 ribonucleoproteins. *Nature Biotechnology* **33**, 1162-U1156 (2015).
- 609 57. Fossi, M., Amundson, K., Kuppu, S., Britt, A. & Comai, L. Regeneration of Solanum tuberosum  
610 Plants from Protoplasts Induces Widespread Genome Instability. *Plant Physiology* **180**, 78-86  
611 (2019).
- 612 58. Pucker, B. et al. Twenty-Five Years of Propagation in Suspension Cell Culture Results in  
613 Substantial Alterations of the Arabidopsis Thaliana Genome. *Genes* **10** (2019).
- 614 59. Zhang, Y. et al. Efficient and transgene-free genome editing in wheat through transient  
615 expression of CRISPR/Cas9 DNA or RNA. *Nature Communications* **7** (2016).
- 616 60. Liang, Z. et al. Efficient DNA-free genome editing of bread wheat using CRISPR/Cas9  
617 ribonucleoprotein complexes. *Nature Communications* **8** (2017).
- 618 61. Zhang, Y.X. et al. Expanding the scope of plant genome engineering with Cas12a orthologs and  
619 highly multiplexable editing systems. *Nature Communications* **12** (2021).
- 620 62. Jia, H.G., Orbovic, V. & Wang, N. CRISPR-LbCas12a-mediated modification of citrus. *Plant*  
621 *Biotechnology Journal* **17**, 1928-1937 (2019).
- 622 63. Jia, H.G., Wang, Y.C., Su, H., Huang, X.E. & Wang, N. LbCas12a-D156R Efficiently Edits  
623 LOB1 Effector Binding Elements to Generate Canker-Resistant Citrus Plants. *Cells* **11** (2022).
- 624 64. Sun, H.J., Uchii, S., Watanabe, S. & Ezura, H. A highly efficient transformation protocol for  
625 Micro-Tom, a model cultivar for tomato functional genomics. *Plant and Cell Physiology* **47**, 426-  
626 431 (2006).
- 627 65. Huang, X.E., Wang, Y.C., Xu, J. & Wang, N. Development of multiplex genome editing toolkits  
628 for citrus with high efficacy in biallelic and homozygous mutations. *Plant Molecular Biology* **104**,  
629 297-307 (2020).
- 630 66. Langmead, B. & Salzberg, S.L. Fast gapped-read alignment with Bowtie 2. *Nature Methods* **9**,  
631 357-U354 (2012).
- 632 67. Li, H. et al. The Sequence Alignment/Map format and SAMtools. *Bioinformatics* **25**, 2078-2079  
633 (2009).
- 634 68. Poplin, R. et al. A universal SNP and small-indel variant caller using deep neural networks.  
635 *Nature Biotechnology* **36**, 983+ (2018).
- 636 69. Robinson, J.T. et al. Integrative genomics viewer. *Nature Biotechnology* **29**, 24-26 (2011).
- 637 70. Liu, H. et al. CRISPR-P 2.0: An Improved CRISPR-Cas9 Tool for Genome Editing in Plants.  
638 *Molecular Plant* **10**, 530-532 (2017).
- 639 71. Bae, S., Park, J. & Kim, J.S. Cas-OFFinder: a fast and versatile algorithm that searches for  
640 potential off-target sites of Cas9 RNA-guided endonucleases. *Bioinformatics* **30**, 1473-1475  
641 (2014).

## 642 **Acknowledgements**

643 We thank Wang lab members for constructive suggestions and insightful discussions. This  
644 project was supported by funding from Florida Citrus Initiative Program, Citrus Research and  
645 Development Foundation, U.S. Department of Agriculture National Institute of Food and  
646 Agriculture grants 2022-70029-38471, 2021-67013-34588, 2018-70016-27412 and 2016-70016-  
647 24833, FDACS Specialty Crop Block Grant Program (N. Wang).

## 648 **Author Contributions**

649 X.H., H.J. and N.W. conceptualized and designed the experiments. X.H., H.J., and Y.W.  
650 performed the experiments. J.X. and J.W. performed bioinformatics. X.H., H.J. and N.W. wrote  
651 the manuscript with input from all co-authors.



652 **Competing interests.** N. W., H. J. and X. H. filed a PCT patent application based on the results  
653 reported in this paper. All other authors declare no competing financial interests.

654 **Correspondence and requests** for materials should be addressed to N. Wang.

655

Fig. 1

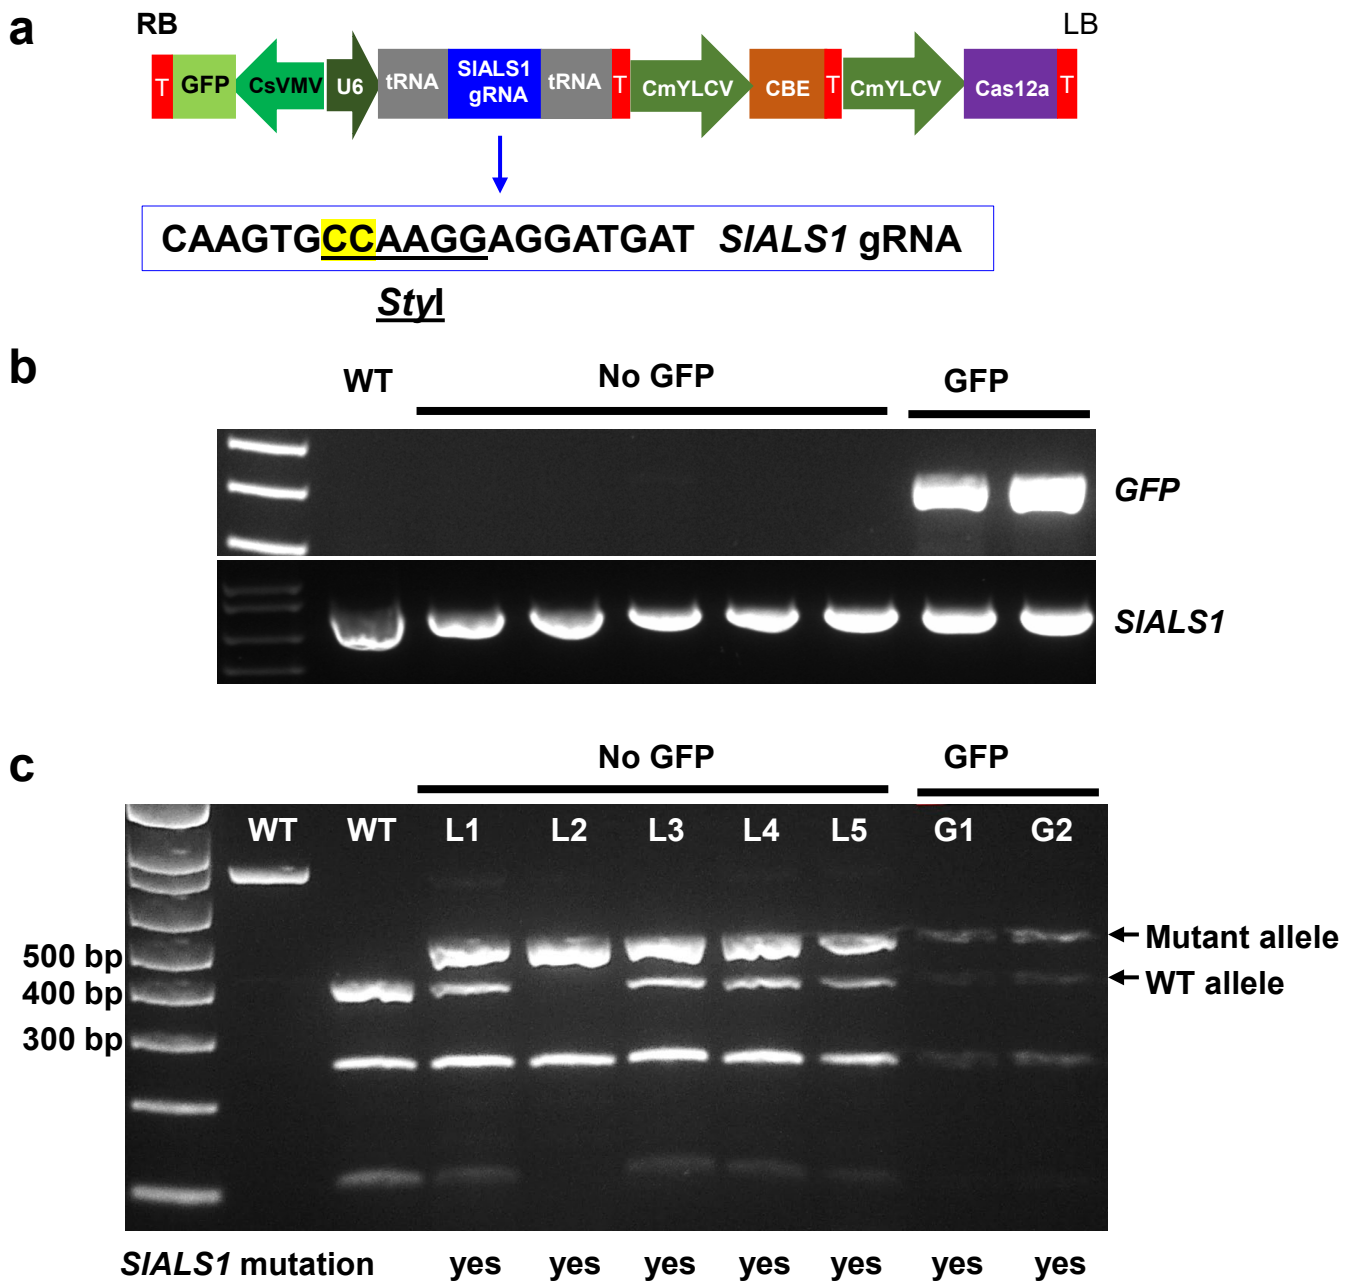

**Fig. 2****a**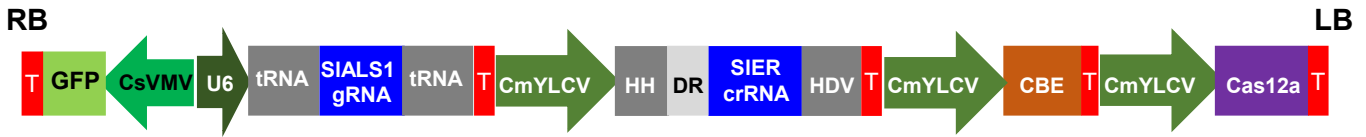**b**

AGC**TTTG**GTTCTGTGGTGTCTGATGATGGTGAGTAGAGTAGAGTAG *SIER* WT

AGC**TTTG**GTTCTGTGGTGT-----GAGTAGAGTAGAGTAG allele 1, -11 bp **Line 2** **biallelic**  
 AGC**TTTG**GTTCTGTGGT-----GAGTAGAGTAGAGTAG allele 2, -13 bp

AGC**TTTG**GTTCTGTGGTGTCTG-----**T**GAGTAGAGTAGAGTAG allele 1, -7 bp **Line 4** **biallelic**  
 AGC**TTTG**GTTCTGTGGTGTCTGATGA-----GTAGAGTAG allele 2, -11 bp

AGC**TTTG**GTTCTGTGGTGTCTG-----AGTAGAGTAG allele 1, -14 bp **Line 5** **biallelic**  
 AGC**TTTG**GTTCTGTGGTGTCTG-----AGAGTAG allele 2, -17 bp

AGC**TTTG**GTTCTGTGGTGTCTGATGATGGTGAGTAGAGTAGAGTAG allele 1, WT **Line 9** **heterozygous**  
 AGC**TTTG**GTTCTGTGGTGTCTGATGA-----GTAGAGTAGAGTAG allele 2, -6 bp

AGC**TTTG**GTTCTGTGGTGTCTGATGATGGTGAGTAGAGTAGAGTAG allele 1, WT **Line 10** **heterozygous**  
 AGC**TTTG**GTTCTGTGGTGTCTGATGATGG---GTAGAGTAGAGTAG allele 2, -3 bp

**c**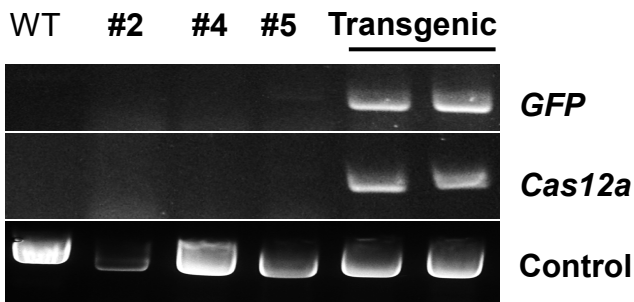**d**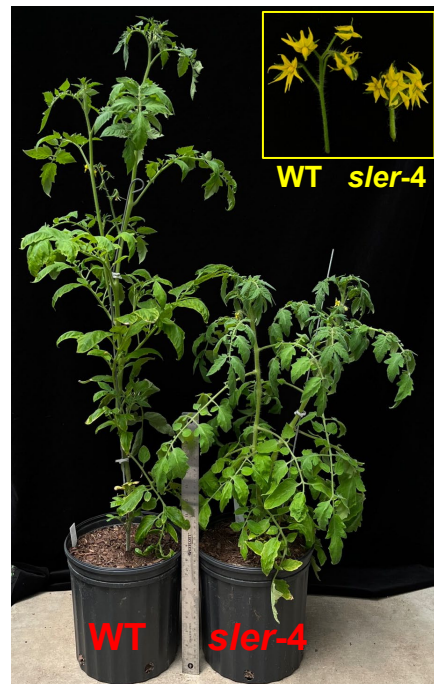**e**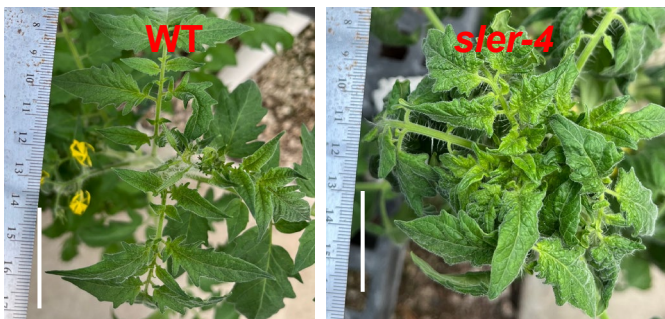

**Fig. 3**

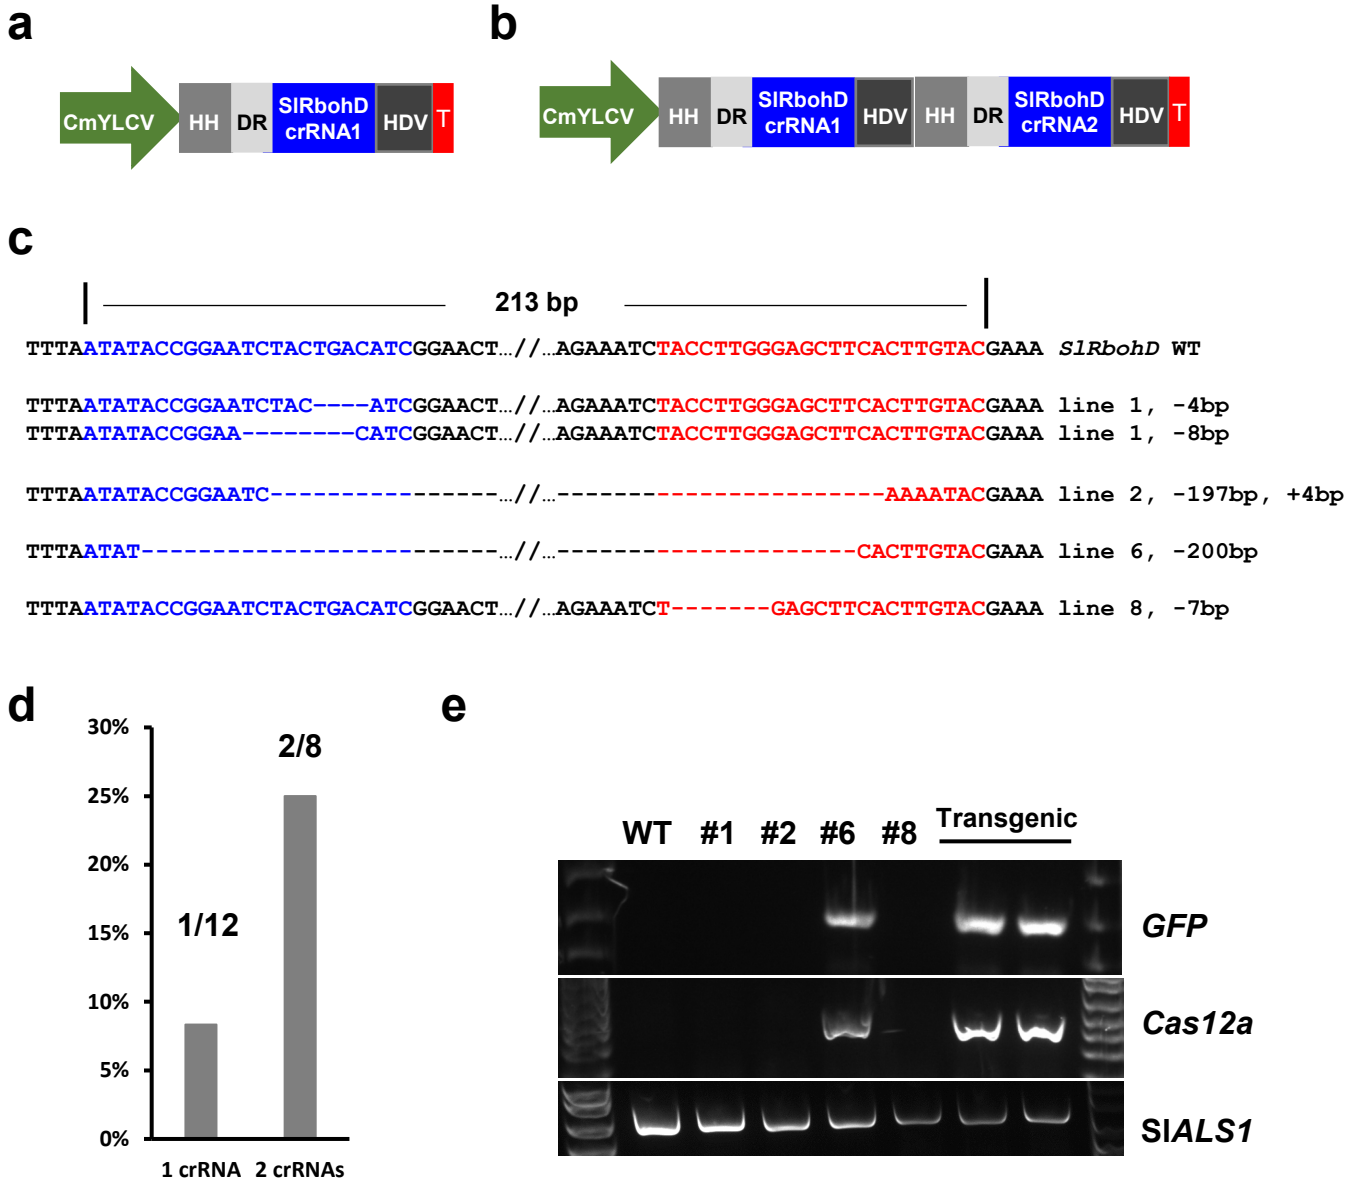

**Fig.4**

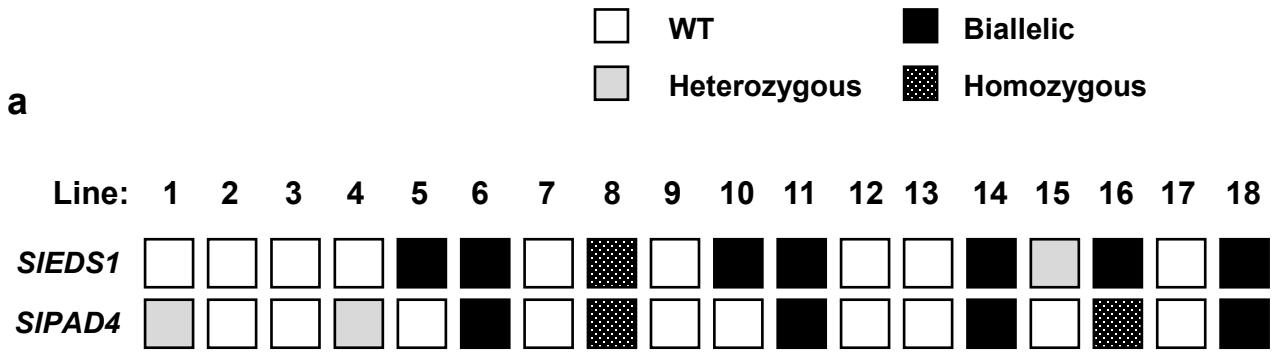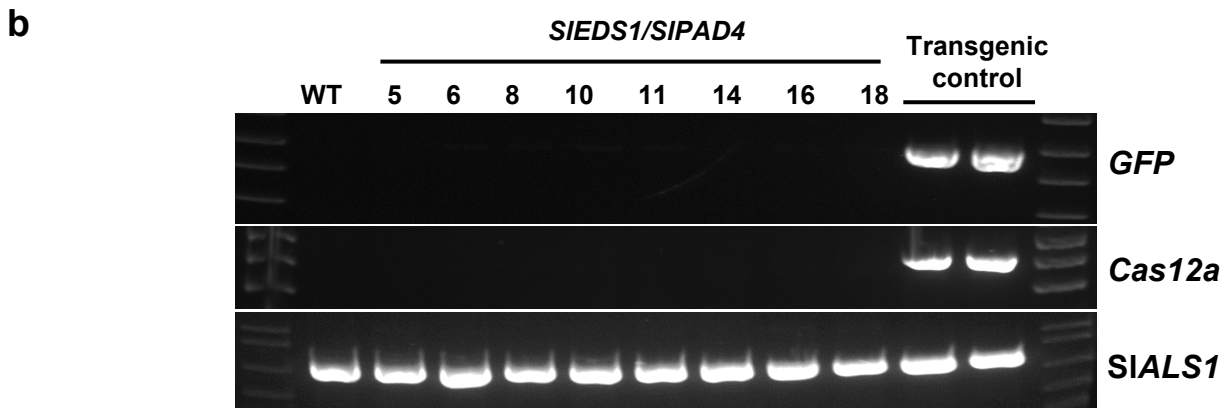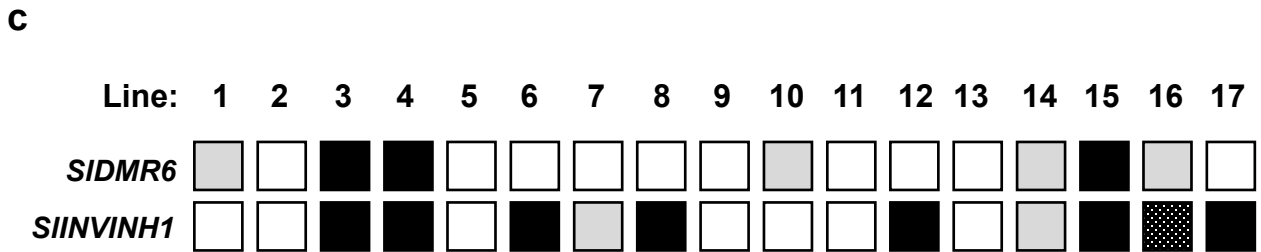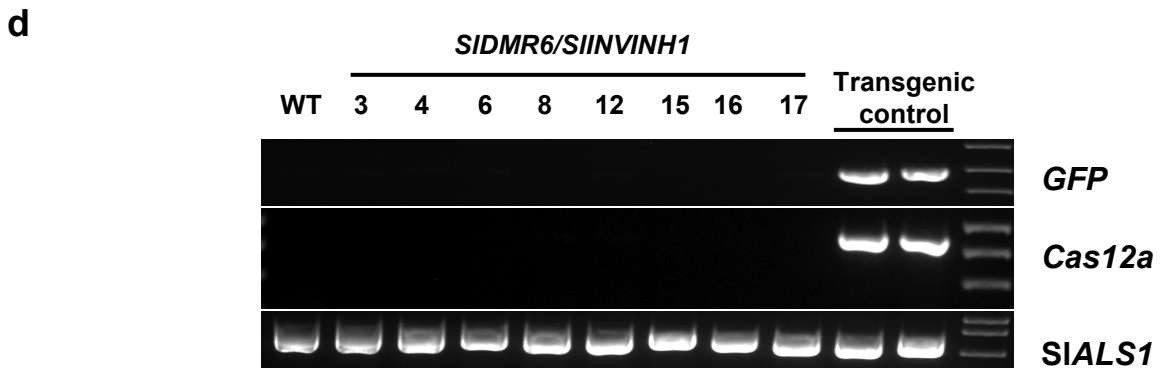

Fig.5

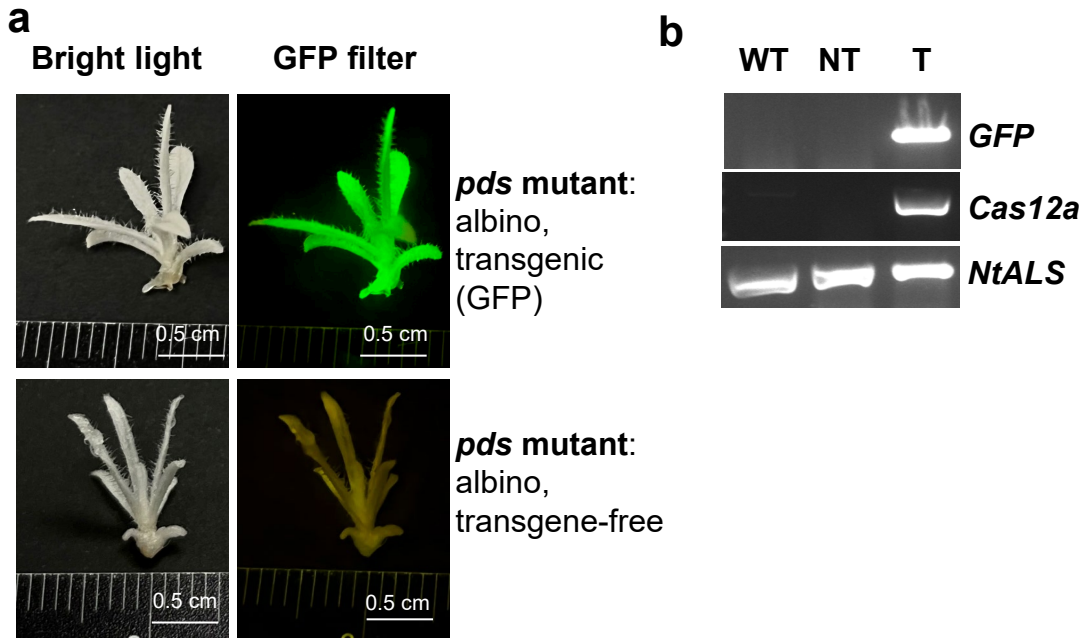

**c**

CAAGTACCACGTAGGATGATGG *NtALS* WT  
 CAAGTATTATGTAGGATGATGG *NtALS* line 4

ATGAAATTTCCGGCAGATCAGAGCAAAGCAAAAAATATTGAAGTATCATG *NtPDS1* WT  
 ATGAAATTTCCGGCAGATCAGAGCAA--CAAAAAATATTGAAGTATCATG -2bp, line 4  
 ATGAAATTTCCGGCAGATCAGAGCAAAGCA----TATTGAAGTATCATG -4bp, line 4

ACGAAATTTCCGGCAGATCAGAGCAAAGCAAAAAATATTGAAGTATCACA *NtPDS2* WT  
 ACGAAATTTCCGGCAGATCAGAGCAAAGCAAA----TTGAAGTATCACA -4bp, line 4  
 ACGAAATTTCCGGCAGATCAGAGCAAA-----TATTGAAGTATCACA -7bp, line 4

**d**

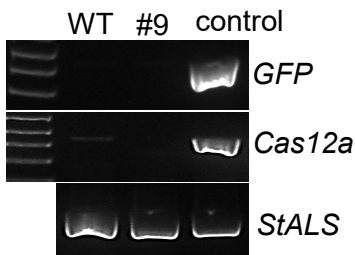

**e**

GAAGCTAAAATTGTATTCAGATGATCCTTCAAA *StDMR6* WT  
 GAAGCTAAAA----ATTCAGATGATCCTTCAAA line 9, allele 1, -4bp  
 GAAGCTAAAAT-----GATGATCCTTCAAA line 9, allele 2, -8bp  
 GAAGCTAAAATTGTATTCAGATGATCCTTCAAA line 9, allele 3, WT  
 GAAGCTAAAATTGTATTCAGATGATCCTTCAAA line 9, allele 4, WT

**Fig. 6**

**a**

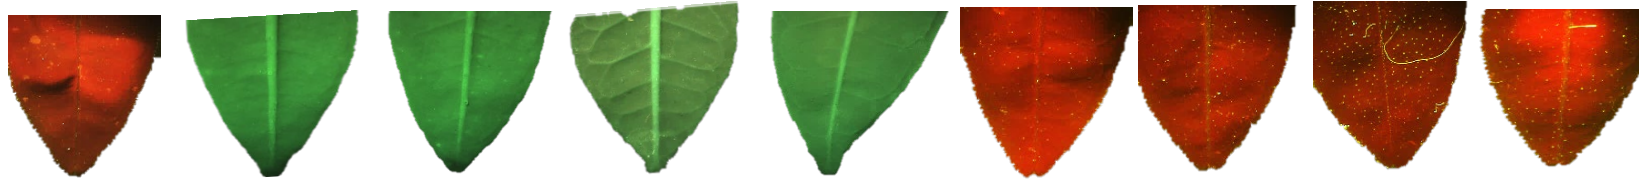

Wild type #Pum<sub>GFP1</sub> #Pum<sub>GFP2</sub> #Pum<sub>GFP3</sub> #Pum<sub>GFP4</sub> #Pum<sub>NoGFP1</sub> #Pum<sub>NoGFP2</sub> #Pum<sub>NoGFP3</sub> #Pum<sub>NoGFP4</sub>

**b**

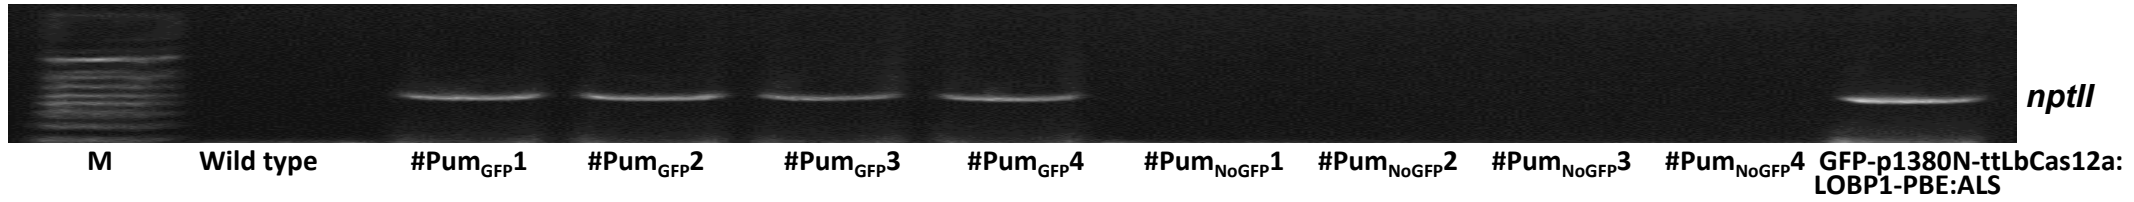

**c**

**Edited lines**

|                        |                                                    |                                                                                                                                                          |
|------------------------|----------------------------------------------------|----------------------------------------------------------------------------------------------------------------------------------------------------------|
| #Pum <sub>NoGFP1</sub> | Wild type (x0)<br>-CCTTTGCCT (x6)<br>-ACCCCTT (x4) | TTGCCTTTCC <b>TTTCTCTATATAAACCCCTTTGCCT</b> AACTTT<br>TTGCCTTTCC <b>TTTCTCTATATAAAC</b> -----TAACTTT<br>TTGCCTTTCC <b>TTTCTCTATATAA</b> -----TGCCTAACTTT |
| #Pum <sub>NoGFP2</sub> | Wild type (x5)<br>-CCCTTTG (x5)                    | TTGCCTTTCC <b>TTTCTCTATATAAACCCCTTTGCCT</b> AACTTT<br>TTGCCTTTCC <b>TTTCTCTATATAAAC</b> -----CCTAACTTT                                                   |
| #Pum <sub>NoGFP3</sub> | Wild type (x0)<br>-CCTTTG (x10)                    | TTGCCTTTCC <b>TTTCTCTATATAAACCCCTTTGCCT</b> AACTTT<br>TTGCCTTTCC <b>TTTCTCTATATAAAC</b> -----CCTAACTTT                                                   |
| #Pum <sub>NoGFP4</sub> | Wild type (x4)<br>-CCTTTGCCT (x6)                  | TTGCCTTTCC <b>TTTCTCTATATAAACCCCTTTGCCT</b> AACTTT<br>TTGCCTTTCC <b>TTTCTCTATATAAAC</b> -----TAACTTT                                                     |

**Genotypes**

biallelic  
heterozygous  
homozygous  
heterozygous

**d**

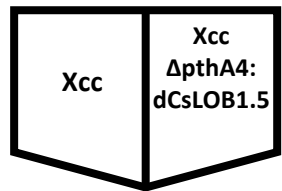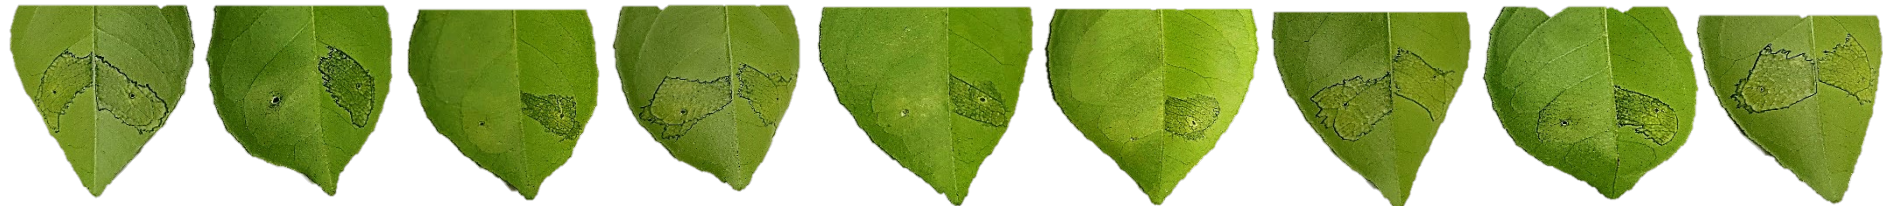

Wild type #Pum<sub>GFP1</sub> #Pum<sub>GFP2</sub> #Pum<sub>GFP3</sub> #Pum<sub>GFP4</sub> #Pum<sub>NoGFP1</sub> #Pum<sub>NoGFP2</sub> #Pum<sub>NoGFP3</sub> #Pum<sub>NoGFP4</sub>
